# Supplementary material
Source: publisher site journal article supplement (https://www.dovepress.com/get_supplementary_file.php?f=270196.docx)
Supplement: Supplementary file 1 [file get_supplementary_file.php]

**Supplement**

**Patient Experience Survey**

Important!

1) All answers should be marked with an "X" in the appropriate box after reading the question. Sometimes you will find an open answer question with some space for you to fill in the blanks. Please make sure you use clear handwriting.

2) Many questions are accompanied by comments to help you complete the survey correctly. They are marked in red italics, or diagonal letters, in brackets, e.g. (fill in the blanks). In case of any doubts - interviewer will try to explain them.

3) If you find this text impossible to read and therefore cannot provide your answers in writing, the interviewer will help in completing the questionnaire.

| **L.p.** | **Question** | **I. Previos Cataract Surgery**  **(first-eye)** | **II. Upcoming surgery** |
| --- | --- | --- | --- |
|  | **Did you have a cataract surgery before** | - Yes - No | - Yes   - No |
|  | **Year of your previous surgery**  → | …………………………………… | …………………………………… |
|  | **What feelings accompanied you the day before operations?** | - Horror and awe - Panic and upset - Fear and anxiety - I was excieted - I wasn't scared - Don’t remember - Other*:*…………………………….................................................................................... | - Horror and awe - Panic and upset - Fear and anxiety - I was excieted - I wasn't scared - Don’t remember   Other*:*…………………………….................................................................................... |
|  | **Did you have such thoughts to give up surgery?** | - Yes - No | - Yes - No |
|  | **If you answered „yes” to the question above, then what influenced your final decision?** | - I talked to my family - I wanted to undergo cataract treatment - Curiosity - Not sure - Other:…………………….   ………………………….…...…...………………………… | - I talked to my family - I wanted to undergo cataract treatment - Curiosity - Not sure - Other:…………………….   ………………………….…...…...………………………… |
|  | **Were you aware that complications may occur during the procedure?** | - Yes - No - Not sure | - Yes - No - Not sure |
|  | **If you answered „yes” to the question above, did you consider changing your mind because of the risk of potential complications?** | - Yes, I wanted to change my decision for a moment - Yes, but every surgery carries some risks with it - No, I did not think about it | - Yes, I wanted to change my decision for a moment - Yes, but every surgery carries some risks with it - No, I did not think about it |
|  | **Was your admission to the hospital smooth and without any complications?** | - Yes - No - Not sure - Other:……………………   ………………………..…..……...………………………… | - Yes - No - Not sure - Other:……………………   ………………………..…..……...………………………… |
|  | **Was blood collection for laboratory tests performed before surgery a pain?** | - Yes - No - Not sure - Other:……………………   …………………………...…..…...………………………… | - Yes - No - Not sure - Other:……........................   …….……………….....…….………...…………….……… |
|  | **What impressions did the interview provide, i.e. the interview conducted by the nurse upon admission to the Ophthalmology Clinic?**  *(choose more than one option)* | - Satisfactory, detailed interview - Not satisfactory, brief interview - Nurse was very helpful - Nurse was not helpful - Interview was longer than expected - Interview was shorter than expected - Not sure - Other:…………………….   ……………………………………………………………… | - Satisfactory, detailed interview - Not satisfactory, brief interview - Nurse was very helpful - Nurse was not helpful - Interview was longer than expected - Interview was shorter than expected - Not sure - Other:…………………….   ……………………………………………………………… |
|  | **How would you describe your medical examination by the doctor?**  *(choose more than one option)* | - Examination was detailed and satisfactory - Examination was brief and not satisfactory - Painless - Painfull - Doctor was helpful - Doctor was not helpful - Doctor was gentle and empathic - Doctor’s examination was hasty and rough. - Doctor explained the details - Doctor did not talk to me about the surgery - Examination lasted longer than expected - Examination lasted shorter than expected - Not sure | - Examination was detailed and satisfactory - Examination was brief and not satisfactory - Painless - Painfull - Doctor was helpful - Doctor was not helpful - Doctor was gentle and empathic - Doctor’s examination was hasty and rough. - Doctor explained the details - Doctor did not talk to me about the surgery - Examination lasted longer than expected - Examination lasted shorter than expected - Not sure |
|  | **Were you given any tablets before the surgery?** | - Yes - No - Not sure | - Yes - No - Not sure |
|  | **If you answered „yes” to the previous question, did your nurse explained the purpose of the medication?** | - Yes - No - Not sure | - Yes - No - Not sure |
|  | **Did you receive IV before the surgery?** | - Yes - No - Not sure | - Yes - No - Not sure |
|  | **If YES, were you explained why?** | - Yes - No - Not sure | - Yes - No - Not sure |
|  | **What best describes the sensations associated with eye dropping before surgery?** | - Burning and sharp pain - Only 'feeling of flooding' eye - I did not think about it - It was very unpleasant - Not sure - Other:…………………….   …………………….....…………............................................. | - Burning and sharp pain - Only 'feeling of flooding' eye - I did not think about it - It was very unpleasant - Not sure - Other:…………………….   …………………….....…………............................................. |
|  | **Did your surgeon explain why these drops are needed?** | - Yes - No - Not sure | - Yes - No - Not sure |
|  | **Did you feel eye irritation after the drops?** | - Yes - No - Not sure | - Yes - No - Not sure |
|  | **Was repeated instillation of eye drops into the operated eye annoying?** | - Yes - No - Not sure | - Yes - No - Not sure |
|  | **Did your doctor explain what happens during the surgery?** | - Yes - No - Not sure | - Yes - No - Not sure |
|  | **Was the information provided by the doctor about possible complications easy to understand** | - Yes - No - Most of it - Not sure | - Yes - No - Most of it - Not sure |
|  | **Were you informed when the lens power was measured?** | - Yes - No - Not sure | - Yes - No - Not sure |
|  | **Was it explained to you what lens it is and for what?** | - Yes - No - Not sure | - Yes - No - Not sure |
|  | **What were your feelings a few minutes before the surgery?** | - Fear and anxiety - Pain - Uncertainty and hope - I was calm - Not sure | - Fear and anxiety - Pain - Uncertainty and hope - I was calm - Not sure |
|  | **How did you stand waiting for "your turn" on the day of the operation?** | - I waited patiently and I was calm - I was nervous about things taking too long - I was upset but waited for my turn - Not sure - Other*:*…….........................................   ................................................  …………………………........ | - I waited patiently and I was calm - I was nervous about things taking too long - I was upset but waited for my turn - Not sure - Other*:* …….........................................   ................................................  …………………………........ |
